# Supplementary material for: Control and regulation of skyrmionic topological charge in a novel synthetic antiferromagnetic nanostructure
Source: Royal Society of Chemistry journal article supplement (doi:10.1039/d2nr06498g), 2023-01-01
Supplement: d2nr06498g1.pdf [file d2nr06498g1.pdf]

## Supplemental Material - Control and regulation of skyrmionics' topological charge in a novel synthetic antiferromagnetic nanostructure

### Supplementary 1:

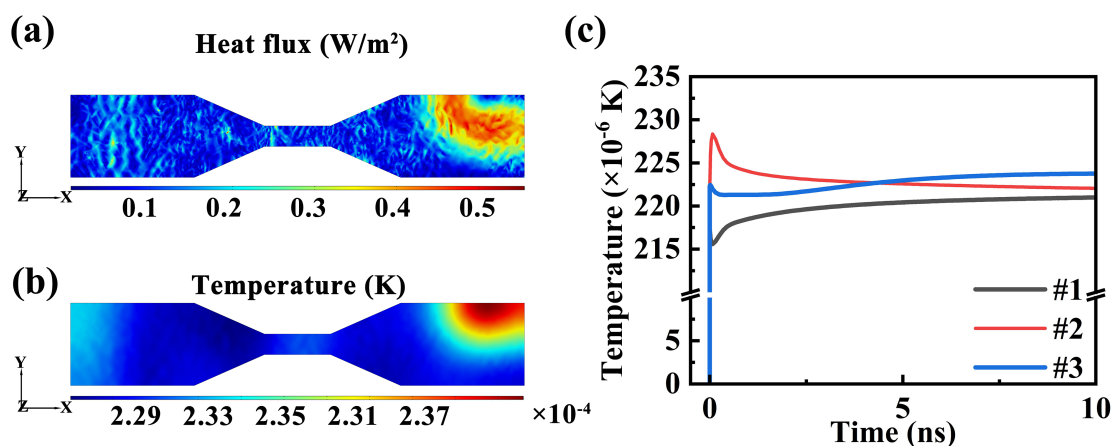

Fig.S1 The field diagram of heat flux (a) and temperature (b) at 10 ns for nanostructure,  $J_{CIP} = 1 \times 10^{13} \text{A/m}^2$ , (b) The temperature of the three representative points (#1, #2 and #3) at 10 ns.

Fig.S1(a and b) show the field diagram of heat flux and temperature at 10 ns for nanostructure, when  $J_{CIP} = 1 \times 10^{13} \text{A/m}^2$ . The multi-physics fields were calculated using COMSOL Multiphysics. The material parameters were based on Pt/Co. As shown in Fig.S1 (a and b), there is heat accumulation in the end of the nanostructure due to Joule Heating. But from the temperature of three representative points at 10 ns, the maximum temperature reaches approximately  $2.30 \times 10^{-4} \text{K}$ .

## Supplementary 2:

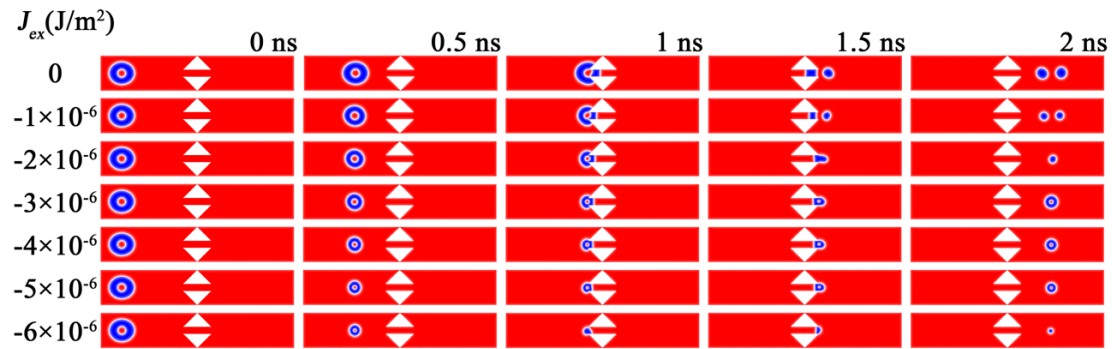

Fig. S2. Phase diagrams of skyrmionium passing the channel with different  $J_{ex}$  (40 nm width and 160 nm length).

( $D = 3 \text{ mJ/m}^2$ ,  $K_{up} = 6 \times 10^5 \text{ J/m}^3$ ,  $K_{low} = 1 \times 10^6 \text{ J/m}^3$ ).

When  $J_{ex}$  is considered, the large skyrmionium is converted into a small one while increasing  $J_{ex}$  (Fig.S2) in synthetic antiferromagnetic (SAF) nanostructure with a narrow channel. When  $J_{ex}$  is stronger than  $-5 \times 10^{-6} \text{ J/m}^2$ , the skyrmionium transforms to annihilation. When is weaker than  $-3 \times 10^{-6} \text{ J/m}^2$ , the skyrmionium transforms to skyrmions. The smaller skyrmionium will cross the channel intactly, when  $J_{ex} = -3 \times 10^{-6} \text{ J/m}^2 \sim -5 \times 10^{-6} \text{ J/m}^2$ .

### Supplementary 3:

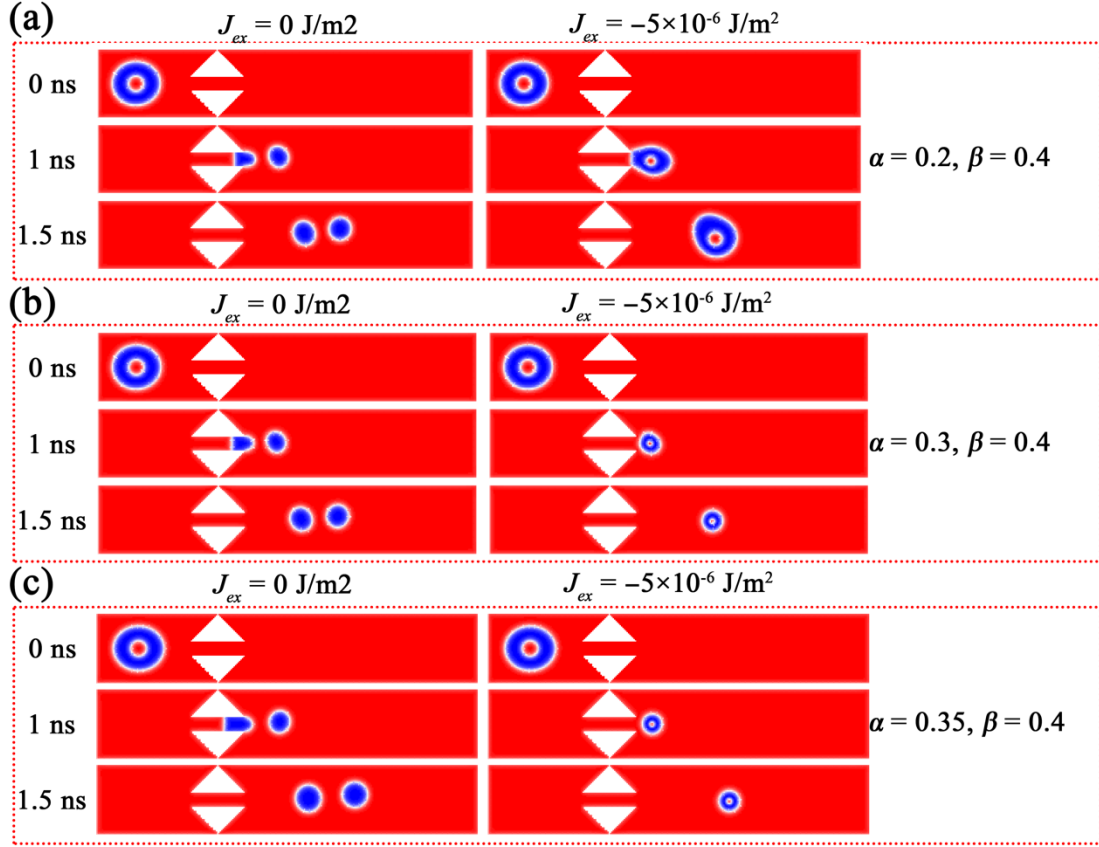

Fig. S3 Phase diagrams of skyrmionium passing the channel when  $\alpha \neq \beta$ . (a)  $\alpha = 0.2, \beta = 0.4$ ; (b)  $\alpha = 0.3, \beta = 0.4$ ; (c)  $\alpha = 0.35, \beta = 0.4$ . ( $D = 3 \text{ mJ/m}^2$ ,  $K_{up} = 6 \times 10^5 \text{ J/m}^3$ ,  $K_{low} = 1 \times 10^6 \text{ J/m}^3$ , and  $J_{CIP} = 1 \times 10^{13} \text{ A/m}^2$ )

For  $\alpha \neq \beta$ , the skyrmion should move slightly upward or downward due to skyrmion Hall Effect. And the skyrmionium becomes deformed because of the local skyrmion Hall effect for the two skyrmions with opposite  $Q$ . The skyrmionium is able to move along the middle line of the nanotrack without distortion under moderate RKKY exchange coupling<sup>1</sup>. Fig.S3 shows the skyrmionium motion in the SAF nanostructure, when  $\alpha \neq \beta$ . The skyrmionium can become two skyrmions ( $Q = \pm 2$ ) under the RKKY AFM exchange coupling or maintain its structure ( $Q = 0$ ) after passing through the channel, which is consistent with the phenomenon of  $\alpha = \beta$ .

### References

1. Z. Yu, B. Gong, C. Wei, R. Wang, L. Xiong, L. You, Y. Zhang, S. Liang, Z. Lu and R. Xiong,

*Applied Physics Letters*, 2022, **121**, 012403.
